# Supplementary material
Source: Springer Nature journal article supplement (https://www.springermedizin.de/resource/supplementary/13054_2013_2953_MOESM4_ESM.pdf/9711824)
Supplement: MOESM4 [file 9711824]

| Study or Subgroup     | Small Bowel |    |            | Gastric |      |            | Weight        | Mean Difference<br>IV, Random, 95% CI | Year |
|-----------------------|-------------|----|------------|---------|------|------------|---------------|---------------------------------------|------|
|                       | Mean        | SD | Total      | Mean    | SD   | Total      |               |                                       |      |
| Montecalvo            | 61          | 17 | 19         | 46.9    | 25.9 | 19         | 9.7%          | 14.10 [0.17, 28.03]                   | 1992 |
| Kearns                | 69          | 7  | 21         | 47      | 7    | 23         | 19.7%         | 22.00 [17.86, 26.14]                  | 2000 |
| Montejo               | 80          | 28 | 50         | 75      | 30   | 51         | 12.0%         | 5.00 [-6.31, 16.31]                   | 2002 |
| Hsu                   | 95          | 5  | 59         | 83      | 6    | 62         | 21.3%         | 12.00 [10.04, 13.96]                  | 2009 |
| Acosta-Escribano      | 92          | 7  | 50         | 84      | 15   | 54         | 19.4%         | 8.00 [3.55, 12.45]                    | 2010 |
| Davies 2012           | 72          | 21 | 91         | 71      | 19   | 89         | 17.9%         | 1.00 [-4.85, 6.85]                    | 2012 |
| <b>Total (95% CI)</b> |             |    | <b>290</b> |         |      | <b>298</b> | <b>100.0%</b> | <b>10.59 [4.76, 16.41]</b>            |      |

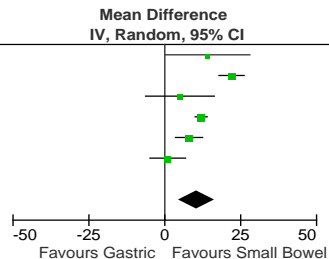

Heterogeneity:  $\tau^2 = 40.41$ ;  $\chi^2 = 40.66$ ,  $df = 5$  ( $P < 0.00001$ );  $I^2 = 88\%$   
 Test for overall effect:  $Z = 3.56$  ( $P = 0.0004$ )

| Study or Subgroup     | Small Bowel |      |            | Gastric |      |            | Weight        | Mean Difference<br>IV, Random, 95% CI | Year |
|-----------------------|-------------|------|------------|---------|------|------------|---------------|---------------------------------------|------|
|                       | Mean        | SD   | Total      | Mean    | SD   | Total      |               |                                       |      |
| Kortbeek              | 34          | 7.1  | 37         | 43.8    | 22.6 | 43         | 26.9%         | -9.80 [-16.93, -2.67]                 | 1999 |
| Neumann               | 43          | 24.1 | 30         | 28.8    | 15.9 | 30         | 23.4%         | 14.20 [3.87, 24.53]                   | 2002 |
| Davies 2002           | 23.2        | 3.9  | 31         | 23      | 3.4  | 35         | 30.8%         | 0.20 [-1.58, 1.98]                    | 2002 |
| Hsu                   | 32.4        | 27.1 | 59         | 54.5    | 51.4 | 62         | 18.8%         | -22.10 [-36.64, -7.56]                | 2009 |
| <b>Total (95% CI)</b> |             |      | <b>157</b> |         |      | <b>170</b> | <b>100.0%</b> | <b>-3.41 [-13.45, 6.62]</b>           |      |

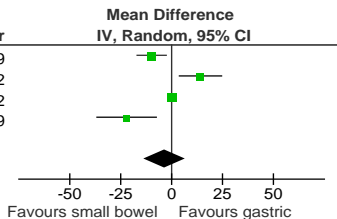

Heterogeneity:  $\tau^2 = 84.16$ ;  $\chi^2 = 23.32$ ,  $df = 3$  ( $P < 0.0001$ );  $I^2 = 87\%$   
 Test for overall effect:  $Z = 0.67$  ( $P = 0.51$ )
